# Supplementary material for: A High Resolution Genome-Wide Scan for Significant Selective Sweeps: An Application to Pooled Sequence Data in Laying Chickens
Source: PubMed Central journal article supplement (PMC3510216; doi:10.1371/journal.pone.0049525), 2012-11-29

Percent of total

6  
4  
2  
0

50 100 150 200 250

Phred score

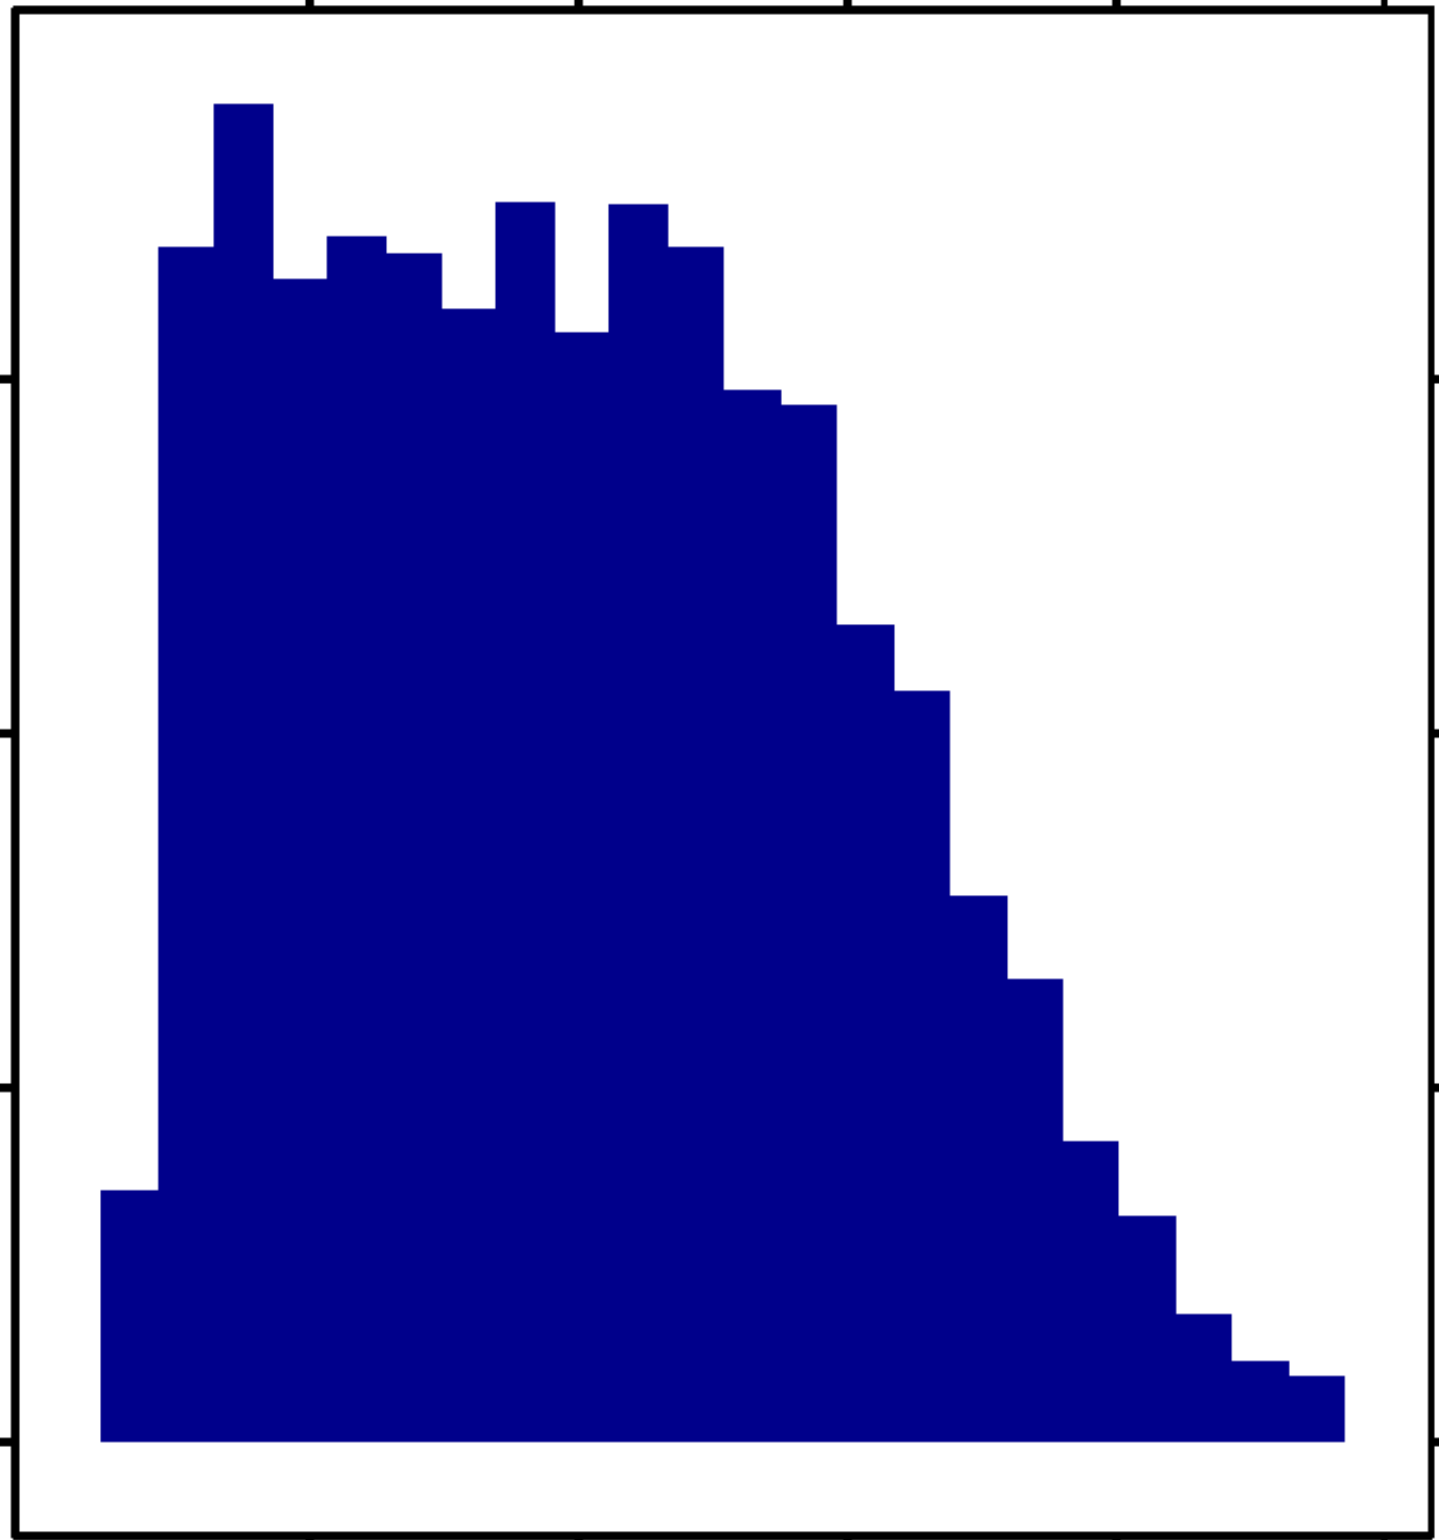

Supplement: pone.0049525.s029.pdf [file pone.0049525.s029.pdf]
