# Supplementary material for: A High Resolution Genome-Wide Scan for Significant Selective Sweeps: An Application to Pooled Sequence Data in Laying Chickens
Source: PubMed Central journal article supplement (PMC3510216; doi:10.1371/journal.pone.0049525), 2012-11-29

Percent of total

15

10

5

0

20

30

40

50

SNP calling read

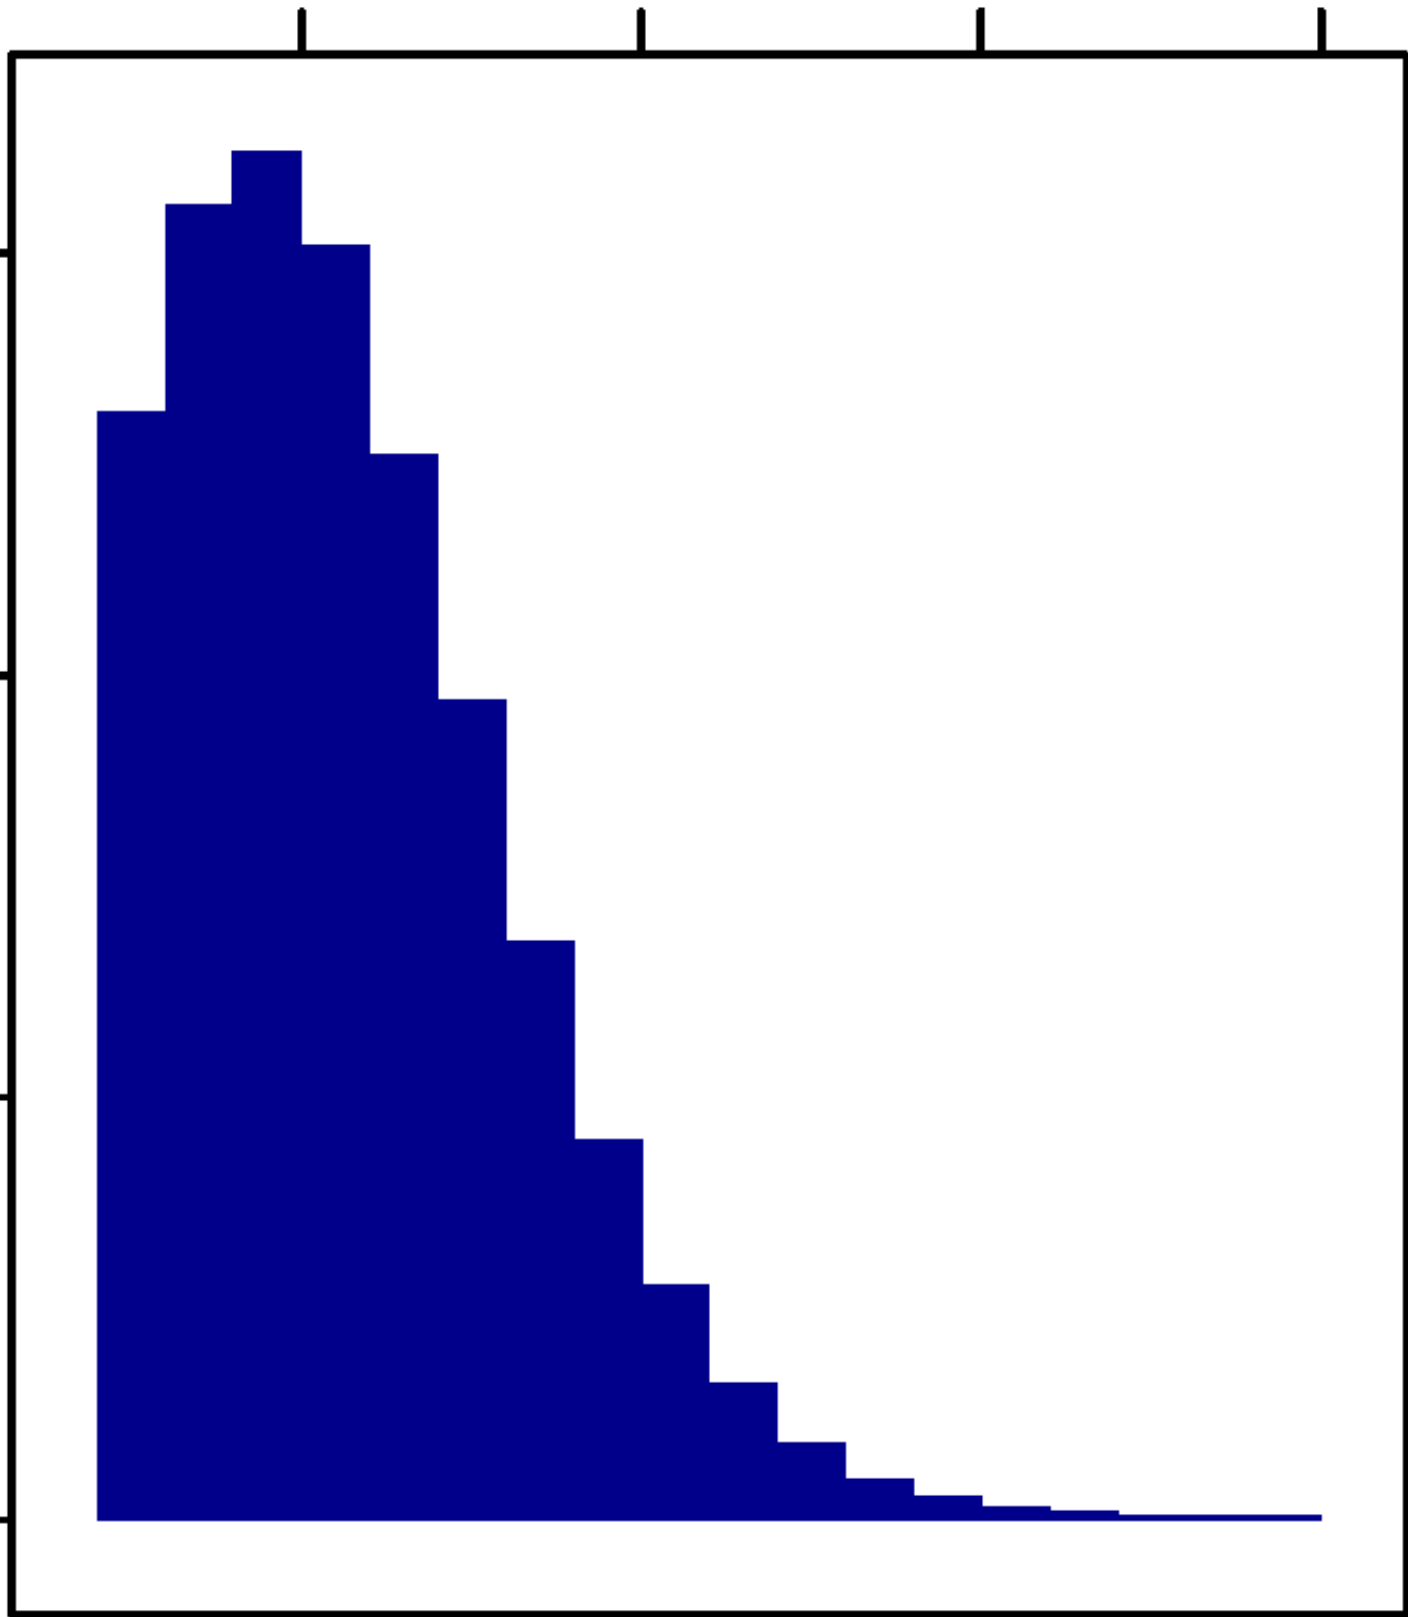

Supplement: pone.0049525.s030.pdf [file pone.0049525.s030.pdf]
